## ***Transient late gestation prenatal hypoxic insult results in functional deficits but not gross neuroanatomic deficits in mice***

Ana G. Cristancho<sup>a, b, c</sup>, Elyse C. Gadra<sup>d</sup>, Ima M. Samba<sup>a</sup>, Chenying Zhao<sup>e, f</sup>, Minhui Ouyang<sup>e, g</sup>, Sergey Magnitsky<sup>e</sup>, Hao Huang<sup>e, g</sup>, Angela N. Viaene<sup>h</sup>, Stewart A. Anderson<sup>d, i</sup>, and Eric D. Marsh<sup>a, b, c</sup>

<sup>a</sup> Division of Child Neurology, <sup>b</sup> Department of Pediatrics, Children's Hospital of Philadelphia, Philadelphia, PA, USA

<sup>c</sup> Department of Neurology, Perelman School of Medicine, University of Pennsylvania, Philadelphia, PA, USA

<sup>d</sup> Department of Child and Adolescent Psychiatry and Behavioral Services, The Children's Hospital of Philadelphia, Philadelphia, PA, USA

<sup>e</sup> Radiology Research, Children's Hospital of Philadelphia Research Institute, Philadelphia, PA, USA

<sup>f</sup> Department of Bioengineering, School of Engineering and Applied Science, University of Pennsylvania, Philadelphia, PA, USA

<sup>g</sup> Department of Radiology, Perelman School of Medicine, University of Pennsylvania, PA, USA

<sup>h</sup> Department of Pathology and Laboratory Medicine, Children's Hospital of Philadelphia, Philadelphia, PA, USA and Perelman School of Medicine, University of Pennsylvania, Philadelphia, PA, USA

<sup>i</sup> Department of Psychiatry, Perelman School of Medicine, University of Pennsylvania, Philadelphia, PA, USA

Short Title: Deficits from transient prenatal hypoxia

Corresponding Author:

Ana G. Cristancho, MD, PhD  
Abramson Research Center, Rm. 516g  
Children's Hospital of Philadelphia,  
3615 Civic Center Blvd.  
Philadelphia, PA. 19104, USA  
Tel: 267-426-6892  
Email: [cristanchoa@chop.edu](mailto:cristanchoa@chop.edu)

Number of Tables: 0

Number of Figures: 7

Word count: 6997

Keywords: prenatal hypoxia, animal model, behavior, imaging

1 **Abstract**

2 Intrauterine hypoxia is a common cause of brain injury in children with a wide spectrum of long-term  
3 neurodevelopmental sequela. Even an insult that does not result in significant neuroanatomical  
4 injury in perinatal brain imaging can lead to lifelong disabilities. Commonly used postnatal HIE  
5 models are not able to directly study the effects of pregnancy risk factors that contribute to  
6 outcomes of hypoxia in children. Large animal models suggest that transient prenatal hypoxia alone  
7 is sufficient to lead to significant functional impairment to the developing brain but published rodent  
8 prenatal hypoxia models are complex (requiring prolonged [days] hypoxic exposure or difficult  
9 surgical procedures) and can be difficult to replicate. Thus, to further understand the mechanisms  
10 underlying hypoxic injury seen in children affected by mild intrauterine hypoxia, murine models that  
11 are simple to reproduce and phenocopy the lack of neuroanatomic injury but have significant  
12 functional deficits are needed. Here we characterized the effect of late gestation (embryonic day  
13 17.5) transient prenatal hypoxia on long-term anatomical and neurodevelopmental outcomes. Late  
14 gestation transient prenatal hypoxia increased hypoxia-inducible factor 1 alpha protein levels (a  
15 marker of hypoxic exposure) in the fetal brain but did not result in any difference in gestational age  
16 at birth, litter size at birth, or pup survival. In addition, there were no differences in fetal brain cell  
17 death or long-term changes in gray or white matter between offspring after normoxia and hypoxia.  
18 However, there were several long-term functional consequences from prenatal hypoxia, including  
19 sex-dichotomous changes. Both males and females had abnormalities in repetitive behaviors,  
20 hindlimb strength, and decreased seizure threshold. Males demonstrated increased anxiety. Females  
21 had deficits in social interaction. Hypoxia did not result in motor or visual learning deficits. This work  
22 demonstrates that transient late gestation prenatal hypoxia is a simple, clinically relevant paradigm  
23 for studying putative environmental and genetic modulators of the long-term effects of transient  
24 hypoxia on the developing brain.

25

## 26 **Introduction**

27 Neonatal hypoxic ischemic encephalopathy (HIE) is due to an intrapartum loss of oxygen and  
28 nutrients that impacts millions of births and results in lives lived with disability, including  
29 neurodevelopmental disabilities (NDDs), such as autism, and epilepsy [1, 2]. Children who are initially  
30 classified as having mild HIE, defined as minimal evidence of perinatal cell death by imaging and  
31 relatively normal neonatal physical exam, can still have adverse outcomes [3-8]. These children do  
32 not qualify for therapeutic hypothermia, the only specific intervention for moderate-severe HIE [9].  
33 The incidence of HIE is disproportionately higher in children born in areas with limited prenatal care  
34 or access to therapies [10] so there is an urgent need for novel, widely available interventions.

35 To understand HIE it is important to consider that *in utero* hypoxic injury differs from postnatal  
36 injury. The *in utero* environment is relatively hypoxic at baseline [11]. The required oxygen tension  
37 during fetal development is tightly regulated as evidenced by brain injury either from early exposure  
38 to relative hyperoxia in premature children or due to *in utero* hypoxia [12, 13]. While HIE is primarily  
39 an *in utero* injury, the most commonly used rodent model is a unilateral carotid ligation followed by  
40 hypoxia at day of life 7-10 (Vannucci Model) [14]. This model has provided many insights [15, 16], in  
41 part, because neuroanatomically the rodent brain is considered human “term” equivalent at postnatal  
42 day 7-10 [17]. However, injury in the Vannucci model is has significant cell death, which is most  
43 consistent with severe injury, and injury is very focal, which is most consistent with perinatal stroke  
44 [14, 18]. Postnatal models also cannot directly study the important contributions of the maternal-  
45 placental unit to HIE severity [19, 20]. Lastly, functional networks do not correlate with neuroanatomic  
46 maturation in rodents [21]; mice do not have the respiratory or feeding dyscoordination at birth that  
47 is characteristic of children born before 34 weeks gestation [22], and they can walk by postnatal day  
48 10, which is a developmental milestone acquired in infants at about a 12 months [21, 23]. Therefore,  
49 it is important to develop prenatal hypoxia models to understand key aspects of the pathophysiology  
50 of HIE as they affect brain development.

51 Mouse models of prenatal hypoxia exist, but they largely study the effects of chronic hypoxia  
52 by exposing dams to mild hypoxia (~ 10% inspired oxygen) throughout gestation [24, 25] or are  
53 technically challenging (late gestation uterine artery ligation) [26]. There have been a few studies of  
54 transient prenatal hypoxia in rodents [27, 28], but most of our understanding of brief, mild insults is  
55 from large animal studies. In sheep, transient prenatal hypoxia leads to long-term structural and  
56 functional injury despite less cell death than hypoxia with ischemia, including deficits in neuron  
57 dendritic complexity and action potential propagation [29, 30].

58 To complement existing models and determine if transient hypoxia has similar findings as

59 seen in large animal studies, here we characterize a simplified model of transient prenatal hypoxia. In  
60 particular, we focus on early and late neuroanatomic injury using clinically anaolgous pathology and  
61 neuroimaging measures as well as wide battery of behavioral studies to determine whether this  
62 model correlates to mild hypoxic injury seen in children.

63

## 64 **Materials and Methods**

### 65 *Animals*

66 Male and female C57Bl/6 mice were purchased from Charles River Laboratories (Wilmington,  
67 MA). Timed matings were used to ensure consistent timing of prenatal hypoxia exposures. Mice were  
68 maintained at the Children’s Hospital of Philadelphia Animal Facility at a 12-hour light, 12-hour dark  
69 cycle (0615-1815 h) and ad libitum access to water and diet mouse food 5015 (LabDiet, St. Louis,  
70 MO). Offspring exposed to prenatal normoxia or hypoxia were periodically weighed by  
71 experimenters blinded to exposure. Animals were group housed for postnatal experiments. Male and  
72 female gonadectomized CD1 mice for Social Interaction were acquired from Charles River  
73 Laboratories. The Institutional Animal Care and Use Committee of the Children’s Hospital of  
74 Philadelphia approved all experiments.

75

### 76 *Prenatal hypoxia*

77 Pregnant females were placed in a controlled oxygen chamber (BioSpherix Ltd., Parish, NY) at  
78 embryonic day 17.5 (E17.5). Mice were acclimated to the chamber for 1-2 minutes at 21% oxygen.  
79 For hypoxic exposures, oxygen concentration was decreased to 5% oxygen over 30 minutes and  
80 maintained at 5% oxygen for duration of experiment (2, 4, 6, or 8 hours). For normoxic control  
81 exposures, pregnant mice were placed in the same controlled oxygen chamber for 8 hours. Dams in  
82 both groups were provided free access to food and hydrogel for hydration throughout the time in  
83 chamber. For locomotion, pregnant mice (normoxia n=4, hypoxia n=4) were videotaped during first  
84 90 minutes in the chamber and cumulative distance the mouse moved in chamber was quantified  
85 with ANY-maze software (Stoelting Co., Wood Dale, IL, USA). Except for protein and RNA studies,  
86 after hypoxia, pregnant dams were monitored for recovery and demonstrated normal locomotion  
87 within 10 minutes of end of exposure. All survival studies were performed after 8 hours of prenatal  
88 hypoxia. Pregnant dams from normoxia and hypoxia were assessed twice per day until delivery to  
89 determine gestational age at birth and number of pups per litter at birth (normoxia n = 19, hypoxia  
90 n = 28.)

91

92

### 93 *RNA isolation and quantitative PCR*

94 Messenger RNA (mRNA) was isolated from flash frozen samples using RNeasy Lipid Tissue  
95 Mini Kit (QIAGEN, Venlo, Netherlands). RNA was isolated with DNase to avoid contamination.  
96 Individual samples shown were isolated from n =11-12 fetal brains/condition in 3 separate  
97 litters/condition. RNA was converted to cDNA with High-Capacity cDNA Reverse Transcription Kit  
98 (Applied Biosystems, Foster City, CA). Quantitative PCR on Quant Studio 12K Flex (Applied  
99 Biosystems, Foster City, CA) was used to quantitate mRNA levels with Taqman of 18s as a  
100 housekeeping gene (Mm03928990\_g1, Thermo Fisher Scientific, Waltham, MA) and the HIF1 $\alpha$  target  
101 gene, *Vegfa* (Mm00437306\_m1, Thermo Fisher Scientific, Waltham, MA). *Vegfa* levels were  
102 normalized to 18S levels in each sample. To normalize between different plates, average of the  
103 normoxic condition, were standardized to 1 and all other samples on that plate were multiplied by  
104 the sample standardization factor.

105

### 106 *Maternal nestlet*

107 Ability for pregnant dams to form a nest after normoxia or hypoxia was used as a proxy for  
108 the ability to form a nurturing environment. A 5-point scale was utilized as previously described, with  
109 a score of 5 being an intact nest [31]. In brief, after 8 hours in oxygen chamber in normoxia or  
110 hypoxia, pregnant dams were placed in new cage with intact cotton squares and no other  
111 environment enrichment cage. They were placed in standard holding room overnight. The following  
112 morning an experimenter obtained an overhead picture of the cage with minimal disruption. A  
113 blinded experimenter scored the pictures.

114

### 115 *Histology*

116 Fetal brains were harvested 24 hours after exposure and placed in 4% paraformaldehyde.  
117 Fixed brains were processed and paraffin-embedded and then sectioned in the coronal plane by the  
118 CHOP Pathology Core into 5  $\mu$ M unstained slides. Every fifth slide was stained with hematoxylin and  
119 eosin and examined to identify brain regions of interest. Apoptotic nuclei in cortex, basal ganglia, and  
120 white matter were counted by a neuropathologist (A.N.V.) who was blinded to condition.

121

### 122 *Ex vivo MRI*

123 High resolution diffusion tensor imaging (DTI) is an effective noninvasive imaging tool to  
124 delineate neuroanatomy [32-34]. Here we used high resolution DTI (0.1×0.1×0.1mm) with MR  
125 scanner of high magnetic strength to examine the morphological and microstructural changes in mice  
126 with hypoxia. MRIs for 7 normoxic animals and 6 hypoxic animals were analyzed.

127

#### 128 *MRI data acquisition*

129 The MRI data was acquired on a Bruker 9.4T vertical bore scanner. A volume coil with inner  
130 diameter of 15mm was used as RF transmitter and receiver. A 3D high-resolution, multi-shot echo  
131 planar imaging (EPI) sequence with eight shots was used to acquire diffusion-weighted images  
132 (DWIs). The parameters for DWIs were as follows: field of view=25.6×12.8×10.0mm; voxel  
133 size=0.1×0.1×0.1mm; echo time=26ms; repetition time=1250ms; 6 or 30 independent diffusion-  
134 weighted directions with a b value of 1500 s/mm<sup>2</sup> and five additional images without diffusion  
135 gradients; two averages.

136

#### 137 *Diffusion tensor fitting*

138 Diffusion tensor was fitted in DTIStudio (<http://www.MRIstudio.org>) [35]. After the  
139 diagonalization of tensor to obtain three eigenvalues ( $\lambda_{(1-3)}$ ) and eigenvectors ( $v_{(1-3)}$ ), mean  
140 diffusivity (MD) was calculated as the mean of three eigenvalues ( $\lambda_{(1-3)}$ ). Fractional anisotropy (FA)  
141 was calculated as follows.

$$FA = \frac{\sqrt{(\lambda_1 - \lambda_2)^2 + (\lambda_1 - \lambda_3)^2 + (\lambda_2 - \lambda_3)^2}}{\sqrt{2}\sqrt{\lambda_1^2 + \lambda_2^2 + \lambda_3^2}}$$

142

143

#### 144 *Regions of interest (ROIs) delineation, and measurements of volume and thickness*

145 The ROIs, including ventricles, were manually placed on the averaged b0 map or MD map by  
146 referencing known stereotactic reference atlas [36] in ROIEditor (<http://www.MRIstudio.org>). For  
147 genu and splenium of the corpus callosum, the ROIs of consistent size were drawn on seven slices  
148 around mid-sagittal slice of the brain. The volume of the ventricles was calculated as the number of  
149 voxels in the ROI times the voxel size. The thickness of anterior cingulate cortex was measured in the  
150 mid-sagittal region. Volume and thickness measurements were calculated in Matlab (Mathworks,  
151 Inc., Natick, MA, USA).

152

153 *Behavior*

154 Behavior studies following published protocols were performed sequentially starting at 3  
155 months old in the order listed below for all animals [37-43]. Any modifications are listed below. Three  
156 separate cohorts consisting of a total of 5 normoxic litters and 4 hypoxic litters were used.  
157 Composition of experimental groups consisted of normoxic male = 16, hypoxic male = 10, normoxic  
158 female = 22, hypoxic female = 13.

159 All testing except for grip strength was performed between 0700 h to 1300 h. Grip strength  
160 was performed from 1400 h to 1600 h. All animals were given at least 1 day and up to 7 days of rest  
161 between behavior paradigms to minimize carrying effect between studies. Weight was monitored  
162 before each test to ensure there was weight loss consistent with poor health or significant fatigue  
163 between experimental days. No mice were removed from these experiments for outliers. Animals  
164 were not acclimated to handling before Elevated zero maze or Open field, but were subsequently  
165 handled daily between experimental days for 5 minutes per cage. Mice were acclimated to  
166 experimental room at least 30 minutes prior to protocol. Equipment apparatus was cleaned with  
167 cleaning wipes between mice (PDI Sani-Cloth Plus germicidal disposable cloth). ANY-maze software  
168 (Stoelting Co., Wood Dale, IL, USA) was used to video-record and score Elevated zero maze, Open  
169 field, Social interaction, and Morris water maze.

170

171 *Elevated zero maze*

172 Elevated zero maze was modified from previous description [43]. In brief, annular 60 cm  
173 diameter beige apparatus was elevated 50 cm above the ground, with care to ensure it was level.  
174 Two opposing quadrants were “open” and the other two opposing quadrants were “closed” with 16  
175 cm opaque walls but no cover. Experimenter was hidden from the apparatus by black drape  
176 surrounding the apparatus. Illumination was provided overhead with open arms approximately 150-  
177 200 lumens/m<sup>2</sup> and closed arms at 50 lumens/m<sup>2</sup>. Animals were placed in the center of a closed arm  
178 and allowed to roam the apparatus freely for 5 minutes. In addition to time in open arm, head  
179 entries into the open arms and time freezing (immobile at least 1 sec) were detected by ANY-Maze.

180

181 *Open field*

182 Open field was modified from described protocol [42]. In brief, A 53 × 53 cm white plastic box  
183 with 22-cm high walls and no top. Illumination was from overhead fluorescent lights in the 150-200

184 lumens/m<sup>2</sup> range. Experimenter was visually separated from animals in apparatus by black drape.  
185 Each mouse was placed in the center of the box and allowed to roam freely in the box for 15 min.  
186 ANY-maze scored a mouse to be in the periphery if it was within 13 cm of the wall of the box and  
187 otherwise they were considered to be in the center of the box. The distance traveled during the test  
188 in the entire apparatus was also measured.

189

#### 190 *Marble burying*

191 Marble burying was modified from previous studies [37, 39]. A white 41.9 cm x 33.7 cm x  
192 22.5 cm box was filled with 5 cm of fresh bedding. Twenty-four marbles were arranged in a 4 x 6 grid  
193 5 cm apart. Up to 6 mice were tested at the same time so further barriers were placed between the  
194 boxes. Illumination was provided by overhead lights with range of 130-150 lumens/m<sup>2</sup> at each box.  
195 Each mouse was placed in the center of the box for 30 minutes and allowed to roam freely. Pictures  
196 were taken before animals were placed of each chamber and then at the end of the 30 minutes. Two  
197 blinded reviewers examined images to determine whether marbles were buried greater than 2/3rd  
198 into the bedding. Average from the two reviewers of marbles buried for each mouse is reported.

199

#### 200 *Short term nestlet*

201 Short term nestlet experiment was modified from previous study [39]. Animals were placed  
202 in a clean cage with 1 cm of fresh bedding. A pre-cut nestlet with all rough edges removed was  
203 weighed and placed in the center of the cage. Each mouse was placed in the center of the chamber  
204 away from the experimenter and cage lid was placed on top. The mouse was allowed to roam freely  
205 in the chamber for 30 minutes. As multiple animals were in the cages at the same time, barriers were  
206 placed to visually separate the animals. At the end of the 30 minutes, the animals were removed.  
207 Nestlets were removed from the cage and allowed to dry overnight. A blinded experimenter handled  
208 all the nestlets and weighed them after > 24 hours of drying. Change in nestlet weight was calculated  
209 by subtracting from the pre-experiment nestlet weight.

210

#### 211 *Rotarod*

212 Mice were tested on a Rotarod from Ugo Basile (Model 47650, Comerio, Italy) as previously  
213 published [41]. The mice were tested in groups, 5 at a time for 5 min trials with 3 trials per day for 4  
214 days. The Rotarod was used in acceleration mode. The first 2 days, speed increased from 4 rpm up to



215 40 rpm. The last 2 days, speed increased from 8 rpm to 80 rpm. The speed at falling, grappling the  
216 rod without walking for 4 consecutive cycles, or end of 5 minutes for each mouse was recorded as  
217 the end of each trial. Between trials the mice were placed back into individual containers and at the  
218 end of the last trial placed back in home cages. Intertrial time was 15-20 minutes.

219

#### 220 *Social interaction*

221 Social interaction and choice were tested as per previously described [42]. White three  
222 chamber apparatus was filled with 1-2 cm of fresh bedding. The experiment was performed in red  
223 light without fluorescence to resemble night time environment when mice are most likely to interact.  
224 For habituation stage, the experimental mouse was placed for 10 min in apparatus with an empty  
225 clear tube with holes was placed in the center of the left and right chambers. The experimental  
226 mouse was then placed in a temporary holding chamber prior to the next stage. For the novel  
227 mouse/object stage, a sex matched gonadectomized mouse was placed in the tube on the left. In the  
228 tube on the right, a novel object was placed. The experimental animal was then returned to the  
229 apparatus for 5 min. In addition to time in chamber, animals were considered to be “sniffing” the  
230 tube if the head was within 2 cm of the tube by ANY-maze.

231

#### 232 *Grip strength*

233 The grip strength of the mice was tested using a grip strength meter (Model 080312-3  
234 Columbus Instruments, Columbus, OH, USA) as previously published in the Marsh lab [42]. In brief,  
235 each mouse was tested in 6 consecutive trials; 3 were for forelimbs, and 3 for hindlimbs. Each trial  
236 was recorded, and the average for each mouse for forelimb and hindlimb trials is reported.

237

#### 238 *Morris water maze*

239 Morris water maze was performed in a 128 cm round plastic tube filled with room  
240 temperature water (approximately 21°C) as previously published [38, 42]. A platform was submerged  
241 0.5 cm below water surface. Non-toxic white tempera paint was used to opacify the water so the  
242 platform could not be seen from the ledge. Testing was performed in 3 phases: visual acuity trials,  
243 place trials, and probe testing. For both trial phases, in each trial a mouse was allowed to swim for up  
244 to 60 sec to find the platform or was led there at the end of the 60 sec. Once on the platform, the  
245 mouse was maintained on the platform for 15 seconds prior to being dried and placed under a heat

246 lamp for the following trial if having difficulty with drying its coat. There were 4 trials per day. The  
247 visual acuity of each mouse was tested for 2 days by placing a flag that could be seen above the  
248 platform. For each trial, the platform with flag and the location of the mouse was placed in was  
249 changed. A mouse was considered to have normal vision if by the 2nd day it was able to find the  
250 platform at least 50% of the trials before 60 seconds. All mice were deemed to have normal vision.  
251 Place trials were then performed for 5 days. Flag was removed from platform and the platform was  
252 completely submerged in the southwest quadrant. Visual cues were placed in the north, south, east,  
253 and west markers of the tub. For each trial, a mouse was placed in a different location of the tub.  
254 Time to platform and path efficiency were measured in ANY-Maze and average of these measures for  
255 all the trials for each day was reported. For probe testing, platform was removed from the pool. One  
256 hour after last place trial, each mouse was placed in the northeast quadrant and allowed to swim  
257 freely for 60 seconds to assess short term memory. Time spent swimming the in southwest quadrant,  
258 where the platform had been located, was measured. Twenty-four hours after the last place trial,  
259 probe test was repeated to assess long-term memory.

260

#### 261 *Flurothyl seizure threshold*

262 Flurothyl (bis-2,2,2-trifluoroethyl ether, Sigma, St. Louis, MO) testing was modified from  
263 procedure previously described [44, 45]. In brief, 5 to 6 month old mice were place on a platform in a  
264 1.7 L rubber sealed glass chamber (Ikea, Älmhult, Sweden) containing a small amount of the carbon  
265 dioxide scavenger, soda lime (Sigma). Flurothyl was infused with syringe pump at a rate of 6 mL/hour  
266 until the first generalized tonic-clonic seizure (GTC) was observed. The experimenter was blinded to  
267 condition during the experiments. Animals were videotaped throughout the experiment. Two  
268 blinded scorers used a modified Racine scale to define a generalized tonic-clonic seizure [16].

269

#### 270 *Statistical analysis*

271 All animal experiments were performed with experimenter blinded to exposure condition.  
272 The majority of the data is presented using truncated violin plots with individual mice plotted  
273 superimposed on top to display frequency distribution (GraphPad, San Diego, CA). Data are grouped  
274 by hypoxia and sex. Markings on violin plots are as follows: center dashed line is the median value  
275 and lighter lines demonstrate quartiles.

276 For statistics, GraphPad and R-studio were used. Area under the curve was determined for  
277 locomotion of pregnant dams and unpaired t-test was calculated. Mann-Whitney test was used to

278 compare normoxia and hypoxia maternal nestlet shredding, gestational age, litter size, and MRI  
279 studies. Log-rank test was utilized for survival. For RNA, One-Way Nested ANOVA was used in  
280 Graphpad. For all other studies, R was used for statistics. Mixed models with generalized estimating  
281 equations in geepack package in R was utilized for majority of comparisons [46]. Linear mixed-effects  
282 models in lme4 package in R was used for experiments requiring analysis of daily repeated measures  
283 (weights, Rotarod, Morris Water Maze) [47]. Cohort was used as a random effect. Independent  
284 variables for all models included prenatal hypoxia exposure, sex, birth gestational age, and litter size  
285 at birth. Statistical significance displayed for hypoxia, sex, and interaction between hypoxia and sex  
286 as hypoxia has been shown to have sex-dichotomous effects [48, 49]. Statistical significance was set  
287 at \*  $p < 0.05$ , \*\*  $p < 0.01$ , and \*\*\*  $p < 0.001$ . A Benjamini-Hochberg correction was used for all  $p$ -values  
288 from mixed model analyses. Statistical subanalysis for differences for hypoxia based on sex were only  
289 performed if hypoxia or interaction between sex and hypoxia had an adjusted  $p < 0.15$  to determine  
290 if there were more subtle effects unique to each sex or by condition based on the day. Shapiro-Wilk  
291 test was used to determine the normality of the distribution within each test. If the distribution was  
292 normal, the mean and standard deviation are reported. If the distribution was not normal, the  
293 median and interquartile range (IQR) is reported.

294

## 295 **Results**

### 296 *Prenatal hypoxia induces the canonical hypoxic response in the fetal brain*

297 First, we performed a time course to determine the duration of prenatal hypoxia that was  
298 required to induce a reproducible hypoxic molecular response in the fetal brain. The transcription  
299 factor hypoxia inducible factor 1 alpha (Hif1 $\alpha$ ) and its canonical target, vascular endothelial growth  
300 factor A (*Vegfa*), are established molecular markers of the hypoxic response [50]. Hif1 $\alpha$  protein is  
301 stabilized by the intrinsically hypoxic in utero environment [51] but it can be induced further by  
302 prenatal hypoxia (**Fig. 1A & 1B**). *Vegfa* mRNA levels also increased with prenatal hypoxia (**Fig. 1C**).  
303 While the peak of increase for both protein and mRNA was at 4 hours of hypoxia, there was  
304 decreased variability in *Vegfa* after 8 hours of hypoxia. Thus, 8 hours of hypoxia was used for all  
305 further experiments.

306

### 307 *Maternal and offspring survival and health were unaffected by prenatal hypoxia*

308 Pregnant mice demonstrated a decrease in locomotor activity during hypoxic exposure once  
309 oxygen was less than 10% FiO<sub>2</sub>, approximately 20 minutes after start of the hypoxia protocol (**Fig.**

310 **2A**). They survived 8 hours of hypoxia and rapidly recovered during brief observation. Given pregnant  
311 mice locomotion was affected by hypoxia, we tested whether their ability to rear offspring after  
312 hypoxic exposure may be grossly altered. After normoxia or hypoxia, we placed the pregnant mice in  
313 a new clean cage with an intact nestlet square and compared the difference in making a nest as a  
314 proxy for creating a nurturing environment. Sixteen hours after exposure, almost all mice of both  
315 conditions made normal nests (**Fig. 2B**).

316 Offspring health after normoxia and hypoxia was assessed by litter size at birth, birth  
317 gestational age, survival, and weight. There was no statistical difference in litter size at birth (**Fig. 2C**)  
318 or birth gestational age (**Fig. 2D**). In addition, there was no difference in survival of mice through the  
319 first 90 days of life (**Fig. 2E**). Together these results suggest that maternal dams can tolerate and  
320 appropriately rear offspring after prenatal hypoxia and that there is a not a severe, life threatening  
321 phenotype from prenatal hypoxia on the offspring.

322

#### 323 *Prenatal hypoxia does not increase cell death in the fetal brain*

324 In the Vannucci model there has been efforts to determine the kinetics of apoptosis after  
325 injury where apoptosis peaks at 24-48 hours after injury in the co [52]. Based on this work, we  
326 isolated the fetal brain 24 hours after exposure to hypoxia and normoxia (at E18.5), prior to being  
327 born to avoid any confounding effects from birth. A neuropathologist (ANV) blinded to the exposure  
328 condition then counted apoptotic nuclei (**Fig 3A**) in the cortex, basal ganglia, and white matter, three  
329 regions that can have significant cell death in children with acute perinatal hypoxic injury [15]. There  
330 was no increase in apoptotic nuclei in any region of the brain analyzed (**Fig. 3B-3D**).

331

#### 332 *Prenatal hypoxia does not lead to long-term neuroanatomical deficits*

333 To determine if there were long-term neuroanatomic deficits, we performed *ex vivo* MRI in  
334 adult animals that were exposed to normoxia or hypoxia prenatally. Lateral ventricle volume was  
335 measured and demonstrated a single significantly affected outlier in hypoxic animals (**Fig. 4A**), but  
336 overall, there was no significant increase in lateral ventricle size (**Fig. 4B**) or differences in cortical  
337 thickness of the anterior cingulate (**Fig. 4C & D**). Similarly, DTI derived FA measurement of the corpus  
338 callosum, an index of the extent of fiber alignment and myelination, demonstrated no difference  
339 between groups in white matter microstructure of the genu or splenium of the corpus callosum (**Fig.**  
340 **4C, E & F**).

341

#### 342 *Prenatal hypoxia leads to multiple behavior deficits in adult animals*

343 Multiple behavioral domains were tested to determine if prenatal hypoxia leads to long-term

344 deficits that are consistent with differences seen in children with prenatal hypoxic injury. Results  
345 could be divided into three categories – deficits in males and females, sex-dichotomous deficits, and  
346 no deficits. Children with moderate to severe HIE have an increased risk of developing epilepsy after  
347 the acute period [53, 4]. While we did not observe any spontaneous seizures or see sudden death  
348 that would be consistent with uncontrolled epilepsy, we sought to determine if hypoxic animals had  
349 a decrease in seizure threshold through flurothyl seizure threshold testing [44]. We determined that  
350 hypoxic mice had a decreased seizure threshold (mean/SD normoxic male = 229.3 s +/- 53.5, hypoxia  
351 male = 200.0 s +/- 30.3, normoxic female = 211.8 s +/- 47.9, hypoxic female = 182.6 s +/- 27.7) (**Fig.**  
352 **5A**). This data suggest that prenatal hypoxia may predispose animals to subtle network deficits  
353 consistent with decreased seizure threshold.

354 We performed grip strength to determine whether hypoxic mice had long-term motor  
355 deficits [54]. There was a difference at baseline between male and female animals, but there was no  
356 decrease in forelimb grip strength due to prenatal hypoxia (mean/SD normoxic male = 0.044 kg of  
357 force +/- 0.016, hypoxic male = 0.045 kg of force +/- 0.013, normoxic female = 0.037 kg of force +/-  
358 0.012, hypoxic female = 0.039 kg of force +/- 0.009) (**Fig. 5B**). By contrast, hindlimbs did demonstrate  
359 a difference between normoxic and hypoxic animals (mean/SD normoxic male = 0.020 kg of force +/-  
360 0.006, hypoxic male = 0.020 kg of force +/- 0.007, normoxic female = 0.026 kg of force +/- 0.009,  
361 hypoxic female = 0.021 kg of force +/- 0.008) (**Fig. 5C**), suggesting mild strength impairment after  
362 prenatal hypoxia.

363 We also determined if there were any differences in compulsive and repetitive behaviors [37,  
364 39]. Increased marble burying has been associated with an obsessive compulsive related phenotype  
365 [39], but decrease in marble burying has been seen in genetic models of autism, suggesting decrease  
366 in this typical behavior is also pathogenic [55, 56]. Hypoxic animals, particularly females, had a  
367 decrease in marbles buried (mean/SD normoxic male = 10.34 n +/- 5.99, hypoxic male = 6.30 n +/-  
368 5.32, normoxic female = 9.55 n +/- 4.45, hypoxic female = 3.85 n +/- 2.48) (**Fig. 5D**). Consistent with  
369 decreased repetitive behaviors in Marble burying, hypoxic mice demonstrated significant decrease in  
370 a short-term nestlet shredding study, but in this assay the deficit was more prominent in males  
371 (median/IQR normoxic male = -0.05 g /0.20, hypoxic male = -0.10 g/0.20, normoxic female = -0.10  
372 g/0.38., hypoxic female = -0.1 g +/- 0.25) (**Fig. 5E**).

373

374 *Prenatal hypoxia leads to some sex-dichotomous behavior differences in anxiety and social*  
375 *interaction*

376 Anxiety seemed more prevalent in hypoxic males using two different assays. Elevated zero  
377 maze is considered a strong anxiogenic stimulus for animals, where increased anxiety is associated

378 with decreased time in the open arms of the apparatus [57]. Hypoxic males spent less time in the  
379 open arms than normoxic males and there was no effect on females (mean/SD normoxic male =  
380 144.7 s +/- 51.8, hypoxia male = 112.0 s +/- 33.9, normoxic female = 139.0 s +/- 53.7, hypoxic female  
381 = 144.9 s +/- 40.8) (**Fig. 6A**). To determine if this phenotype was confirmed, we performed Open field  
382 testing, another well-established assay for anxiety where increased anxiety is associated with  
383 decrease time in the center of the apparatus [57]. Here we observed that hypoxic males spent less  
384 time in the center of the field than normoxic males (median/IQR normoxic male = 151.8 s/128.8,  
385 hypoxic male = 127.6 s/105.3) (**Fig 6B**). Notably, females spend less time than males in the center in  
386 general and there was no added affect by hypoxia (normoxic female = 86.3 s/69.0., hypoxic female =  
387 84.5 s/104.7). These differences in Open field testing were not due to differences in total distance  
388 travelled (mean/SD normoxic male = 36.9 m +/- 11.5, hypoxia male = 36.6 m +/- 10.3, normoxic  
389 female = 40.8 m +/- 12.2, hypoxic female = 39.4 m +/- 13.1,  $p = 0.60$  between normoxia and hypoxia).

390 Hypoxic insults can be associated with social deficits like autism [58], so we performed three  
391 chamber social interaction testing. In the initial stage of this test, we demonstrated that mice did not  
392 have any preference for the left or right side of the chamber (**Fig. 6C & D**). In the second stage, a  
393 novel mouse was placed in a cup in the left side of the chamber and a novel object was placed on the  
394 right side of the chamber. As expected, normoxic males and females demonstrated a preference for  
395 the novel mouse compared to the novel object (**Fig. 6E & F**). Hypoxic males demonstrated a similar  
396 increase in preference for the novel mouse (**Fig. 6E**). However, hypoxic females did not have as  
397 strong of a preference for the novel mouse (**Fig. 6F**), suggesting a decrease in social interaction only  
398 in female animals.

399

#### 400 *Prenatal hypoxia does not lead to deficits in learning or memory*

401 To determine whether prenatal hypoxia led to more significant deficits in learning or  
402 memory, we tested motor learning and visual spatial learning and memory. In Rotarod testing for  
403 motor learning and coordination [41], there was no difference between hypoxia and normoxia (**Fig.**  
404 **7A**).

405 Morris water maze was used to test for deficits in learning and memory [38]. Place trials  
406 demonstrated there was no difference between normoxic and hypoxic mice in time to platform (**Fig.**  
407 **7B**). Probe testing in Morris water maze was used to determine if there were any differences in  
408 memory. Prenatal hypoxia did not predispose mice of either sex to short or longer term memory  
409 deficits (**Fig. 7C & D**). Together, this data suggests that this prenatal hypoxia model does not by itself  
410 predispose animals to significant cognitive deficits.

411

## 412 **Discussion/Conclusion**

413 Here we have demonstrated that a simple prenatal hypoxia model is able to recapitulate  
414 some of the features seen in children with mild HIE. Specifically, after prenatal hypoxia, animals have  
415 evidence of molecular induction of hypoxic response, minimal differences in early markers of injury  
416 and long-term gross neuroanatomic injury, but evidence of long-term functional deficits. Some if  
417 these deficits are analogous to neurodevelopmental disabilities seen in children after HIE, including  
418 in deficits in anxiety [59], motor function [60], and susceptibility to seizures [4, 61]. The functional  
419 deficits in the absence of long-term structural deficits is also consistent with lack of gross anatomic  
420 deficits in children with mild HIE [4, 62]. This model did not, however, demonstrate significant  
421 deficits in motor learning or visual-spatial learning that would more directly correlate to cognitive  
422 deficits sometimes seen in these children [7]. Together, these data suggest that this model allows for  
423 understanding the contribution of prenatal injury to long-term outcomes in the absence of significant  
424 structural injury.

425 The significance of this model stems from its relationship to the clinically-relevant context of  
426 mild HIE and has some features that can complement gaps in the well-established postnatal models  
427 [15, 16]. One of the strengths of this model is that like most HIE in neonates, it is a prenatal injury  
428 and, therefore, can be used to understanding the physiology of *in utero* insult. Understanding the  
429 specific effects of pathologic hypoxia in the *in utero* environment is important because the fetal  
430 environment is intrinsically hypoxic at baseline [51, 27]. The compensation for further hypoxia may  
431 be different in the fetal brain compared to the postnatal brain considering that the fetal brain is  
432 already more likely to use anaerobic respiration than the postnatal brain for energy [63]. Hif1 $\alpha$  can  
433 regulate metabolism [64] and in neural cells is required for normal brain development [65], indicating  
434 the importance of hypoxia for cell survival and differentiation. In this study, we corroborated  
435 previous findings that Hif1 $\alpha$  protein levels are stabilized in the fetal cortex of normoxic animals [51].  
436 We further demonstrated an increase within the first 4 hours of hypoxia that was correlated to  
437 induction of one of its downstream targets, *Vegfa*. Interestingly, Hif1 $\alpha$  levels peak at 4 hours of  
438 hypoxia and then decreases after 8 hours. This decrease suggests that there may be an initial  
439 capacity to compensate for hypoxia that is lost over time. The fluctuation of HIF1 $\alpha$  levels during  
440 different duration of hypoxia may someday be found to have clinical relevance since the duration of  
441 *in utero* hypoxic injury prior to HIE can be elusive because frequently the diagnosis of HIE relies on  
442 recognition of the hypoxic event by mother or providers [15, 66].

443 Another advantage of a prenatal model is that it would allow more direct study of the effects  
444 of different pathologies of the maternal-placental unit on the pathophysiology of HIE. Conditions that



445 lead to chronic prenatal hypoxia, such as excessive weight gain during pregnancy, are risk factors for  
446 worse outcomes from HIE [67]. This possible detrimental effect of prenatal chronic hypoxia on acute  
447 hypoxic neonatal injury is in sharp contrast to postnatal adult stroke studies where hypoxic  
448 preconditioning is protective of acute and long-term injury [68]. The epidemiological link between  
449 chronic hypoxia conditions *in utero* and acute hypoxic *in utero* injury warrants further study and this  
450 model is poised to study these acute-on-chronic interactions in a manner that cannot be directly  
451 studied in postnatal models.

452 This model may also be useful to study the effects of sex on outcomes from prenatal hypoxia  
453 by comparing these findings to other preclinical models. Clinical studies of long-term outcomes of  
454 HIE are underpowered to determine sex-related differences in long-term outcomes [69, 61] but have  
455 been suspected since there are sex differences from other causes of perinatal brain injury [70]. Sex  
456 differences have been observed in other models of hypoxia and hypoxic-ischemic injury [71, 70, 72,  
457 49]. It is not clear if there are consistent sex-dichotomies in anxiety or autism in children after HIE. In  
458 particular, it is also not clear if the mild differences in females in social interactions in this mouse  
459 model has a true clinical correlate since males are typically most affected by autism in general [73].  
460 There are sex-dependent regional differences in brain development[74]. The MRI studies here are  
461 underpowered to determine if hypoxia has sex-dichotomous effects on specific regions, but future  
462 studies in this model can focus on the possible relationship between specific regions and sex-  
463 dichotomous behavioral differences.

464 In trying to determine the caveats and limitations of interpreting findings from this model, it  
465 is important to consider whether prenatal hypoxia models human “term” or “preterm” injury. The  
466 rodent brain at postnatal day 0 is similar to a 23-30 week gestation human brain and is considered  
467 human “term” equivalent at postnatal day 7-10 [17]. This prenatal model might be limited for  
468 studying some of the neuroanatomic effects of hypoxia relatively to term infants. However, it is  
469 suitable for studying the effects of hypoxia on acquisition of neurodevelopment milestones and  
470 functional networks in rodents that are equivalent between postnatal day 0 and term infants [21].  
471 Mice do not have respiratory distress or feeding dyscoordination at birth that is frequently present in  
472 children born at less than 34 weeks gestation [22]. Furthermore, mice acquire the ability to crawl  
473 within a few days of life and are generally capable of immature walking by postnatal day 10, which is  
474 generally a developmental milestone acquired in a 12 month old infant [21]. Thus, for future  
475 directions this model of prenatal hypoxia is well-suited to study the effect of hypoxia on these  
476 clinically relevant networks that are still developing in the term human brain through behavior and  
477 electrophysiology. Additionally, this model is likely more suitable for studying the neuroanatomic  
478 effects of hypoxia in preterm HIE, which is an understudied but likely important clinical modulator of



479 neurodevelopmental outcomes in preterm infants [75]. While white matter microstructure is  
480 affected in premature infants and we did not see differences in the selected ROIs of corpus callosum  
481 (e.g., genu or splenium), lack of abnormality in the corpus callosum does not rule out more subtle  
482 effects in white matter development [76]. Future *ex vivo MRI* studies with larger sample sizes may  
483 help to systematically quantify the potential subtle difference of white matter microstructure  
484 between mice exposed to normoxia or hypoxia prenatally. Similarly, there may also be more subtle  
485 differences in neuron structure that are not captured by gray matter thickness or increase in *ex*  
486 *vacuo* ventriculomegaly.

487         Another limitation of this model includes that it does not have a true “ischemic” component  
488 and it lacks gross neuronal injury that has been associated with the most severe cases of children  
489 with HIE and the cell death seen in the Vannucci model [18]. Animals in the Vannucci model  
490 demonstrate visual spatial learning deficits [16] that are absent in this model; it is likely these deficits  
491 in the Vannucci model are related to the extent of hippocampal cell death and injury from the carotid  
492 ligation and not to the differences in gestational age. The need for both hypoxia and ischemia for  
493 significant cell death *in vivo* is supported in prenatal sheep studies that directly compare transient  
494 hypoxia to transient hypoxia-ischemia [29, 30]. These differences in cell survival between hypoxia  
495 only and hypoxia with ischemia are replicated in cell culture; neurons can survive in hypoxia alone  
496 but are much more susceptible to cell death in the setting of hypoxia with glucose depletion [77]. It  
497 is, thus, possible that in prenatal hypoxia the absence of cell death and absence of subsequent long-  
498 term anatomic injury is due to the absence of ischemia. Like transient prenatal hypoxia in sheep,  
499 though, we demonstrate long-term functional deficits, most notably in seizure threshold differences.  
500 Therefore, this model can be leveraged to understand the molecular mechanisms driven primarily by  
501 hypoxia that lead to functional deficits.

502         In conclusion, here we present a simplified, easy to reproduce, model of prenatal hypoxic  
503 injury that phenocopies many of the functional deficits consistent with findings in children with mild  
504 HIE. We expect these results will provide a platform to study the effects of prenatal risk factors and  
505 sex-dichotomous effects of hypoxia. This prenatal model may also provide an attractive platform for  
506 studying the genetic factors that exacerbate the mild phenotype (e.g. determine which factors  
507 protect from cell death in the setting of hypoxia only) and thereby provide mechanistic insight into  
508 why 40% of patients have moderate to severe disability after HIE. Ultimately, with comparative  
509 studies amongst models of prenatal and postnatal injury we can better understand the full spectrum  
510 of relevant disease from hypoxia to the developing brain and determine opportunities for novel  
511 interventions.

512

## 513 **Acknowledgements**

514 We thank the Small Animal Imaging Facility at the Research Institute of the Children's Hospital of  
515 Philadelphia (CHOP), the CHOP Pathology Core, and the Neurobehavior Testing Core, and  
516 EEG/Epilepsy core at UPenn and IDDRC at CHOP/Penn [Grant: U54 HD086984] for assistance. We  
517 thank Dr. Rui Xiao in the Department of Biostatistics at UPenn for her advice on statistical analysis.  
518 We thank Brenna Daugherty for initial studies monitoring pregnant mouse locomotion. We are  
519 grateful to Daniel Licht and the Wolfson family for providing the Biospherix oxygen chambers. We are  
520 grateful to Dr. Michal Elovitz and members of the Marsh and Anderson labs for numerous insightful  
521 discussions conversations regarding the data in this manuscript.

522

## 523 **Statement of Ethics**

524 Studies involving animals were approved by the Institutional Animal Care and Use Committee  
525 (IACUC) at the Children's Hospital of Philadelphia.

526

## 527 **Conflict of Interest Statement**

528 The authors have no conflicts of interest to declare.

529

## 530 **Funding Sources**

531 This work was supported by the National Institutes of Health [Grant: 5K12HD043245-18,  
532 R01MH092535, R01MH092535-S1 and U54HD086984], and institutional grants from the Children's  
533 Hospital of Philadelphia, including Neurology Black Tie Tailgate Fund, Foerderer Grant, and K-  
534 readiness Pilot award.

535

## 536 **Author Contributions**

537 A.G.C conceived the project and designed, performed, analyzed and interpreted components of all  
538 the experiments. E.C.G. completed immunoblots and behavior experiments. I.M.S. completed  
539 behavior experiments and assessed maternal dam health. C.Z and S.M. performed the MRI  
540 experiments. M.O. and H.H. analyzed the MRI experiments. A.N.V. completed the histology for  
541 apoptosis. S.A.A. and E.D.M. participated in conceiving the project and interpretation of the data.

542 A.G.C wrote the initial manuscript and finalized all versions. All other authors participated in revisions  
543 of the manuscript.

544

545 **Data Availability Statement**

546 All data generated or analyzed during this study are included in this article. Further enquiries can be  
547 directed to the corresponding author.

## References

1. Lee AC, Kozuki N, Blencowe H, Vos T, Bahalim A, Darmstadt GL, et al. Intrapartum-related neonatal encephalopathy incidence and impairment at regional and global levels for 2010 with trends from 1990. *Pediatr Res*. 2013 Dec;74 Suppl 1(SUPPL. 1):50-72.
2. Stanaway JD, Afshin A, Gakidou E, Lim SS, Abate D, Abate KH, et al. Global, regional, and national comparative risk assessment of 84 behavioural, environmental and occupational, and metabolic risks or clusters of risks for 195 countries and territories, 1990–2017: a systematic analysis for the Global Burden of Disease Study 2017. *The Lancet*. 2018;392(10159):1923-94.
3. de Haan M, Wyatt JS, Roth S, Vargha-Khadem F, Gadian D, Mishkin M. Brain and cognitive-behavioural development after asphyxia at term birth. *Dev Sci*. 2006 Jul;9(4):350-8.
4. van Kooij BJ, van Handel M, Nievelstein RA, Groenendaal F, Jongmans MJ, de Vries LS. Serial MRI and neurodevelopmental outcome in 9- to 10-year-old children with neonatal encephalopathy. *J Pediatr*. 2010 Aug;157(2):221-27 e2.
5. Eunson P. The long-term health, social, and financial burden of hypoxic-ischaemic encephalopathy. *Dev Med Child Neurol*. 2015 Apr;57 Suppl 3:48-50.
6. Reiss J, Sinha M, Gold J, Bykowski J, Lawrence SM. Outcomes of Infants with Mild Hypoxic Ischemic Encephalopathy Who Did Not Receive Therapeutic Hypothermia. *Biomed Hub*. 2019 Sep-Dec;4(3):1-9.
7. Finder M, Boylan GB, Twomey D, Ahearne C, Murray DM, Hallberg B. Two-Year Neurodevelopmental Outcomes After Mild Hypoxic Ischemic Encephalopathy in the Era of Therapeutic Hypothermia. *JAMA Pediatr*. 2020 Jan 1;174(1):48-55.
8. Schreglmann M, Ground A, Vollmer B, Johnson MJ. Systematic review: long-term cognitive and behavioural outcomes of neonatal hypoxic-ischaemic encephalopathy in children without cerebral palsy. *Acta Paediatr*. 2020 Jan;109(1):20-30.
9. Ahearne CE, Boylan GB, Murray DM. Short and long term prognosis in perinatal asphyxia: An update. *World J Clin Pediatr*. 2016 Feb 8;5(1):67-74.
10. Chin EM, Jayakumar S, Ramos E, Gerner G, Soares BP, Cristofalo E, et al. Preschool Language Outcomes following Perinatal Hypoxic-Ischemic Encephalopathy in the Age of Therapeutic Hypothermia. *Dev Neurosci*. 2019 Jun 5:1-11.
11. Hutter D, Kingdom J, Jaeggi E. Causes and mechanisms of intrauterine hypoxia and its impact on the fetal cardiovascular system: a review. *Int J Pediatr*. 2010;2010:401323.
12. Jauniaux E, Watson AL, Hempstock J, Bao YP, Skepper JN, Burton GJ. Onset of maternal arterial blood flow and placental oxidative stress. A possible factor in human early pregnancy failure. *Am J Pathol*. 2000 Dec;157(6):2111-22.
13. Panfoli I, Candiano G, Malova M, De Angelis L, Cardiello V, Buonocore G, et al. Oxidative Stress as a Primary Risk Factor for Brain Damage in Preterm Newborns. *Front Pediatr*. 2018;6:369.
14. Rice JE, 3rd, Vannucci RC, Brierley JB. The influence of immaturity on hypoxic-ischemic brain damage in the rat. *Ann Neurol*. 1981 Feb;9(2):131-41.
15. Ferriero DM. Neonatal brain injury. *N Engl J Med*. 2004 Nov 4;351(19):1985-95.
16. Sun H, Juul HM, Jensen FE. Models of hypoxia and ischemia-induced seizures. *J Neurosci Methods*. 2016 Feb 15;260:252-60.
17. Semple BD, Blomgren K, Gimlin K, Ferriero DM, Noble-Haeusslein LJ. Brain development in rodents and humans: Identifying benchmarks of maturation and vulnerability to injury across species. *Pergamon*; 2013. p. 1-16.
18. Northington FJ, Chavez-Valdez R, Martin LJ. Neuronal cell death in neonatal hypoxia-ischemia. *Ann Neurol*. 2011 May;69(5):743-58.
19. Badawi N, Kurinczuk JJ, Keogh JM, Alessandri LM, O'Sullivan F, Burton PR, et al. Antepartum

- risk factors for newborn encephalopathy: the Western Australian case-control study. *BMJ*. 1998 Dec 5;317(7172):1549-53.
20. Kurinczuk JJ, White-Koning M, Badawi N. Epidemiology of neonatal encephalopathy and hypoxic-ischaemic encephalopathy. Elsevier; 2010. p. 329-38.
  21. Feather-Schussler DN, Ferguson TS. A Battery of Motor Tests in a Neonatal Mouse Model of Cerebral Palsy. *J Vis Exp*. 2016 Nov 3(117):e53569-e69.
  22. Behrman RE, Butler AS. Mortality and acute complications in preterm infants. Preterm birth: causes, consequences & prevention. 2006.
  23. Aziz NM, Guedj F, Pennings JLA, Olmos-Serrano JL, Siegel A, Haydar TF, et al. Lifespan analysis of brain development, gene expression and behavioral phenotypes in the Ts1Cje, Ts65Dn and Dp(16)1/Yey mouse models of Down syndrome. *Dis Model Mech*. 2018 Jun 12;11(6).
  24. Baud O, Daire JL, Dalmaz Y, Fontaine RH, Krueger RC, Sebag G, et al. Gestational hypoxia induces white matter damage in neonatal rats: a new model of periventricular leukomalacia. *Brain Pathol*. 2004 Jan;14(1):1-10.
  25. Mallard C, Vexler ZS. Modeling ischemia in the immature brain: How translational are animal models? 2015.
  26. Kubo KI, Deguchi K, Nagai T, Ito Y, Yoshida K, Endo T, et al. Association of impaired neuronal migration with cognitive deficits in extremely preterm infants. *JCI Insight*. 2017 May 18;2(10).
  27. Howell KR, Pillai A. Effects of prenatal hypoxia on schizophrenia-related phenotypes in heterozygous reeler mice: a gene x environment interaction study. *Eur Neuropsychopharmacol*. 2014 Aug;24(8):1324-36.
  28. Howell KR, Pillai A. Long-Term Effects of Prenatal Hypoxia on Schizophrenia-Like Phenotype in Heterozygous Reeler Mice. *Mol Neurobiol*. 2016 Jul;53(5):3267-76.
  29. McClendon E, Shaver DC, Degener-O'Brien K, Gong X, Nguyen T, Hoerder-Suabedissen A, et al. Transient Hypoxemia Chronically Disrupts Maturation of Preterm Fetal Ovine Subplate Neuron Arborization and Activity. *J Neurosci*. 2017 Dec 6;37(49):11912-29.
  30. McClendon E, Wang K, Degener-O'Brien K, Hagen MW, Gong X, Nguyen T, et al. Transient Hypoxemia Disrupts Anatomical and Functional Maturation of Preterm Fetal Ovine CA1 Pyramidal Neurons. *J Neurosci*. 2019 Oct 2;39(40):7853-71.
  31. Deacon RM. Assessing nest building in mice. *Nat Protoc*. 2006;1(3):1117-9.
  32. Huang H, Zhang J, Wakana S, Zhang W, Ren T, Richards LJ, et al. White and gray matter development in human fetal, newborn and pediatric brains. *Neuroimage*. 2006 Oct 15;33(1):27-38.
  33. Huang H, Yamamoto A, Hossain MA, Younes L, Mori S. Quantitative cortical mapping of fractional anisotropy in developing rat brains. *J Neurosci*. 2008 Feb 6;28(6):1427-33.
  34. Huang H, Xue R, Zhang J, Ren T, Richards LJ, Yarowsky P, et al. Anatomical characterization of human fetal brain development with diffusion tensor magnetic resonance imaging. *J Neurosci*. 2009 Apr 1;29(13):4263-73.
  35. Jiang H, van Zijl PC, Kim J, Pearlson GD, Mori S. DtiStudio: resource program for diffusion tensor computation and fiber bundle tracking. *Comput Methods Programs Biomed*. 2006 Feb;81(2):106-16.
  36. Paxinos G, Franklin KBJ. Paxinos and Franklin's the Mouse Brain in Stereotaxic Coordinates. 2001.
  37. Deacon RM. Digging and marble burying in mice: simple methods for in vivo identification of biological impacts. *Nat Protoc*. 2006;1(1):122-4.
  38. Vorhees CV, Williams MT. Morris water maze: procedures for assessing spatial and related forms of learning and memory. *Nat Protoc*. 2006;1(2):848-58.
  39. Witkin JM. *Animal Models of Obsessive-Compulsive Disorder*. Hoboken, NJ, USA: John Wiley

- & Sons, Inc.; 2008. p. 9.30.1-9.30.9.
40. Yang M, Silverman JL, Crawley JN. Automated three-chambered social approach task for mice. *Curr Protoc Neurosci*. 2011 Jul;Chapter 8:Unit 8 26.
  41. Rothwell PE, Fuccillo MV, Maxeiner S, Hayton SJ, Gokce O, Lim BK, et al. Autism-associated neuroligin-3 mutations commonly impair striatal circuits to boost repetitive behaviors. *Cell*. 2014 Jul 3;158(1):198-212.
  42. Simonet JC, Sunnen CN, Wu J, Golden JA, Marsh ED. Conditional Loss of Arx From the Developing Dorsal Telencephalon Results in Behavioral Phenotypes Resembling Mild Human ARX Mutations. *Cereb Cortex*. 2015 Sep;25(9):2939-50.
  43. Tucker LB, McCabe JT. Behavior of Male and Female C57BL/6J Mice Is More Consistent with Repeated Trials in the Elevated Zero Maze than in the Elevated Plus Maze. *Front Behav Neurosci*. 2017;11:13.
  44. Kadiyala SB, Papandrea D, Herron BJ, Ferland RJ. Segregation of seizure traits in C57 black mouse substrains using the repeated-flurothyl model. *PLoS One*. 2014;9(3):e90506.
  45. Ferland RJ. The Repeated Flurothyl Seizure Model in Mice. *Bio Protoc*. 2017 Jun 5;7(11).
  46. Halekoh U, Højsgaard S, Yan J. TheRPackagegeepackfor Generalized Estimating Equations. *Journal of Statistical Software*. 2006;15(2):1-11.
  47. Bates D, Mächler M, Bolker B, Walker S. Fitting Linear Mixed-Effects Models Usinglme4. *Journal of Statistical Software*. 2015;67(1).
  48. Demarest TG, Schuh RA, Waddell J, McKenna MC, Fiskum G. Sex-dependent mitochondrial respiratory impairment and oxidative stress in a rat model of neonatal hypoxic-ischemic encephalopathy. *J Neurochem*. 2016 Jun;137(5):714-29.
  49. Aravamuthan BR, Gandham S, Young AB, Rutkove SB. Sex may influence motor phenotype in a novel rodent model of cerebral palsy. *Neurobiol Dis*. 2020 Feb;134:104711.
  50. Semenza GL. Oxygen sensing, hypoxia-inducible factors, and disease pathophysiology. *Annu Rev Pathol*. 2014;9(1):47-71.
  51. Trollmann R, Strasser K, Keller S, Antoniou X, Grenacher B, Ogunshola OO, et al. Placental HIFs as markers of cerebral hypoxic distress in fetal mice. *Am J Physiol Regul Integr Comp Physiol*. 2008 Dec;295(6):R1973-81.
  52. Nakajima W, Ishida A, Lange MS, Gabrielson KL, Wilson MA, Martin LJ, et al. Apoptosis has a prolonged role in the neurodegeneration after hypoxic ischemia in the newborn rat. *J Neurosci*. 2000 Nov 1;20(21):7994-8004.
  53. Belet N, Belet U, Incesu L, Uysal S, Ozinal S, Keskin T, et al. Hypoxic-ischemic encephalopathy: correlation of serial MRI and outcome. *Pediatr Neurol*. 2004 Oct;31(4):267-74.
  54. Brooks SP, Dunnett SB. Tests to assess motor phenotype in mice: A user's guide. 2009.
  55. Jaramillo TC, Speed HE, Xuan Z, Reimers JM, Escamilla CO, Weaver TP, et al. Novel Shank3 mutant exhibits behaviors with face validity for autism and altered striatal and hippocampal function. *Autism Res*. 2017 Jan;10(1):42-65.
  56. Drapeau E, Riad M, Kajiwarra Y, Buxbaum JD. Behavioral Phenotyping of an Improved Mouse Model of Phelan-McDermid Syndrome with a Complete Deletion of the Shank3 Gene. *eNeuro*. 2018 May-Jun;5(3).
  57. Cryan JF, Holmes A. Model organisms: The ascent of mouse: Advances in modelling human depression and anxiety. 2005.
  58. Van Handel M, Swaab H, De Vries LS, Jongmans MJ. Long-term cognitive and behavioral consequences of neonatal encephalopathy following perinatal asphyxia: A review. 2007.
  59. van Handel M, Swaab H, de Vries LS, Jongmans MJ. Behavioral outcome in children with a history of neonatal encephalopathy following perinatal asphyxia. *J Pediatr Psychol*. 2010 Apr;35(3):286-95.
  60. Barnett A, Mercuri E, Rutherford M, Haataja L, Frisone MF, Henderson S, et al. Neurological

- and perceptual-motor outcome at 5 - 6 years of age in children with neonatal encephalopathy: relationship with neonatal brain MRI. *Neuropediatrics*. 2002 Oct;33(5):242-8.
61. Shankaran S, Pappas A, McDonald SA, Vohr BR, Hintz SR, Yolton K, et al. Childhood outcomes after hypothermia for neonatal encephalopathy. *N Engl J Med*. 2012 May 31;366(22):2085-92.
  62. Annink KV, de Vries LS, Groenendaal F, van den Heuvel MP, van Haren NEM, Swaab H, et al. The long-term effect of perinatal asphyxia on hippocampal volumes. *Pediatr Res*. 2019 Jan;85(1):43-49.
  63. Oyarzábal A, Musokhranova U, Barros L, García-Cazorla A. Energy metabolism in childhood neurodevelopmental disorders. *EBioMedicine*. 2021 Jul;69:103474.
  64. Gaspar JM, Velloso LA. Hypoxia Inducible Factor as a Central Regulator of Metabolism - Implications for the Development of Obesity. *Front Neurosci*. 2018 11/01/2018;12:813.
  65. Tomita S, Ueno M, Sakamoto M, Kitahama Y, Ueki M, Maekawa N, et al. Defective brain development in mice lacking the Hif-1alpha gene in neural cells. *Mol Cell Biol*. 2003 Oct;23(19):6739-49.
  66. Perlman JM. Pathogenesis of hypoxic-ischemic brain injury. *Journal of Perinatology*. 2007;27(S1):S39-S46.
  67. Peebles PJ, Duello TM, Eickhoff JC, McAdams RM. Antenatal and intrapartum risk factors for neonatal hypoxic ischemic encephalopathy. *J Perinatol*. 2020 Jan;40(1):63-69.
  68. Stowe AM, Altay T, Freie AB, Gidday JM. Repetitive hypoxia extends endogenous neurovascular protection for stroke. *Ann Neurol*. 2011 Jun;69(6):975-85.
  69. Glass HC, Hong KJ, Rogers EE, Jeremy RJ, Bonifacio SL, Sullivan JE, et al. Risk factors for epilepsy in children with neonatal encephalopathy. *Pediatr Res*. 2011 Nov;70(5):535-40.
  70. Smith AL, Alexander M, Rosenkrantz TS, Sadek ML, Fitch RH. Sex differences in behavioral outcome following neonatal hypoxia ischemia: insights from a clinical meta-analysis and a rodent model of induced hypoxic ischemic brain injury. *Exp Neurol*. 2014 Apr;254:54-67.
  71. Hill CA, Fitch RH. Sex differences in mechanisms and outcome of neonatal hypoxia-ischemia in rodent models: Implications for sex-specific neuroprotection in clinical neonatal practice. 2012.
  72. Charriaut-Marlangue C, Besson VC, Baud O. Sexually dimorphic outcomes after neonatal stroke and hypoxia-ischemia. *MDPI AG*; 2018.
  73. Baron-Cohen S, Knickmeyer RC, Belmonte MK. Sex differences in the brain: implications for explaining autism. *Science*. 2005 Nov 4;310(5749):819-23.
  74. Qiu LR, Fernandes DJ, Szulc-Lerch KU, Dazai J, Nieman BJ, Turnbull DH, et al. Mouse MRI shows brain areas relatively larger in males emerge before those larger in females. *Nat Commun*. 2018 Jul 5;9(1):2615.
  75. Gopagondanahalli KR, Li J, Fahey MC, Hunt RW, Jenkin G, Miller SL, et al. Preterm hypoxic-ischemic encephalopathy. *Frontiers Media SA*; 2016. p. 114-14.
  76. Salmaso N, Jablonska B, Scafidi J, Vaccarino FM, Gallo V. Neurobiology of premature brain injury. *Nat Neurosci*. 2014 Mar;17(3):341-6.
  77. Almeida A, Delgado-Esteban M, Bolanos JP, Medina JM. Oxygen and glucose deprivation induces mitochondrial dysfunction and oxidative stress in neurones but not in astrocytes in primary culture. *J Neurochem*. 2002 Apr;81(2):207-17.



## Figure Legends

**Fig. 1: Prenatal hypoxia paradigm induces a canonical HIF1 $\alpha$  response consistent with hypoxic insult in the fetal brains.** (A) Representative immunoblot of HIF1 $\alpha$  protein in fetal brains after indicated time of prenatal hypoxia. (B) HIF1 $\alpha$  protein quantification shown. Statistics by One-Way ANOVA with Dunnett's multiple comparison test for statistical significance. (C) Vegfa mRNA levels after time of prenatal hypoxia. Points shown in graphs are from individual fetal brains. Nested One-Way ANOVA with Dunnett's multiple comparison test for statistical significance.

**Fig. 2: Maternal dams make normal nests and there is no early difference in litter health.** (A) Cumulative distance over time of pregnant dams during the first 90 minutes the mice were in chamber. Area under the curve is shaded and the dashed line around each condition represents SEM of respective condition. Dashed black line is where mice reach 10% O<sub>2</sub>. Statistics shown for the first 20 minutes of chamber exposure and then for 1 hour after hypoxic mice reached goal oxygen level. (B) Scoring of maternal nestlets the morning after normoxia or hypoxia. Points represent individual dams that were assessed. (C) Litter size at birth and (D) gestational age at birth for indicated individual litters were assessed. Welch's t-test used for (A-D). (E) Percent survival of offspring. Error bars represent standard error at that time point. Log-rank test used for statistics between normoxia (solid black line) and hypoxia (dashed blue line).

**Fig. 3: Prenatal hypoxia does not increase cell death in the fetal brain.** (A) Representative image of apoptotic nuclei (arrows) within cortex, hematoxylin and eosin stain. Scale bar represents 50  $\mu$ M (B-D) Number of apoptotic nuclei in the cortex, basal ganglia, and white matter, reported as average seen in 10 separate high-powered fields. Welch's t-test was used to determine statistical significance.

**Fig. 4: Prenatal hypoxia does not result in long-term gross neuroanatomical damage** (A) Axial images of adult female brain MRI (averaged b0 map) of indicated conditions from individual mice. (B) Quantification of ventricular size in the setting of normoxia and hypoxia. Hypoxic animals from (A) represented by indicated symbols in (B). (C) Mid-sagittal image demonstrating the areas that were quantified, the anterior cingulate cortex (light blue line) the genu of the corpus callosum (orange circle), and the splenium of the corpus callosum (pink circle). (D) Quantification of cortical



thickness at the anterior cingulate. (E & F) Quantification of fractional anisotropy in mid-sagittal areas of the genu and splenium of the corpus callosum respectively. Statistics as outlined in the methods. Points represent individual mice.

**Fig. 5: Prenatal hypoxia leads to functional deficits in adult mice.** (A) Flurothyl seizure threshold study demonstrating time to first GTC. (B & C) Data from Grip strength. (B) Forelimbs and (C) hindlimbs force. (E) Number of marbles buried. (F) Change in nestlet weight in short term nestlet test. Statistics as outlined in the methods. Points represent individual mice.

**Fig. 6. Sex-dichotomous behaviour differences after prenatal hypoxia.** (A) Time spent in open arms in Elevated zero maze. (B) Total time animals spent in the center of Open field. (A-D) Percent time in each individual chamber during stages of social interaction study. (A-B) Data from habituation stage from males and females. (C-D) Data from novel mouse/object stage from males and female. (E-H) Percent time mice spent sniffing at the plastic clear tube. Statistics as outlined in the methods. Points represent individual mice.

**Fig. 7: Prenatal hypoxia does not lead to deficits in learning or memory.** (A) Speed at fall on Rotarod. (B-C) Data from Morris Water Maze. (B) Latency time to platform in place trials. (C) One-hour probe trial. (D) Twenty-four hour probe trial. Statistics performed as detailed in methods. Each point represents a single animal.

Figure 1

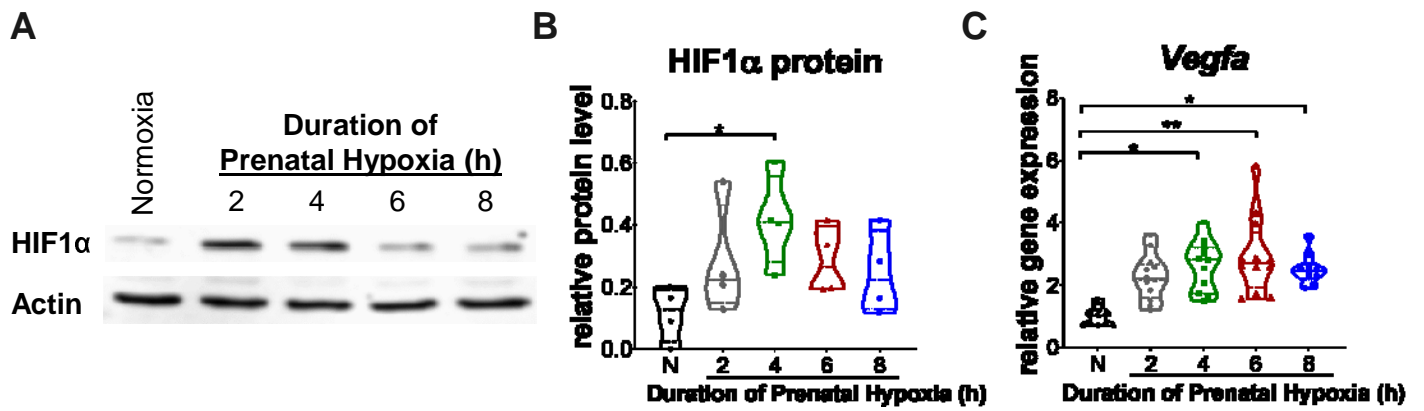

Figure 2

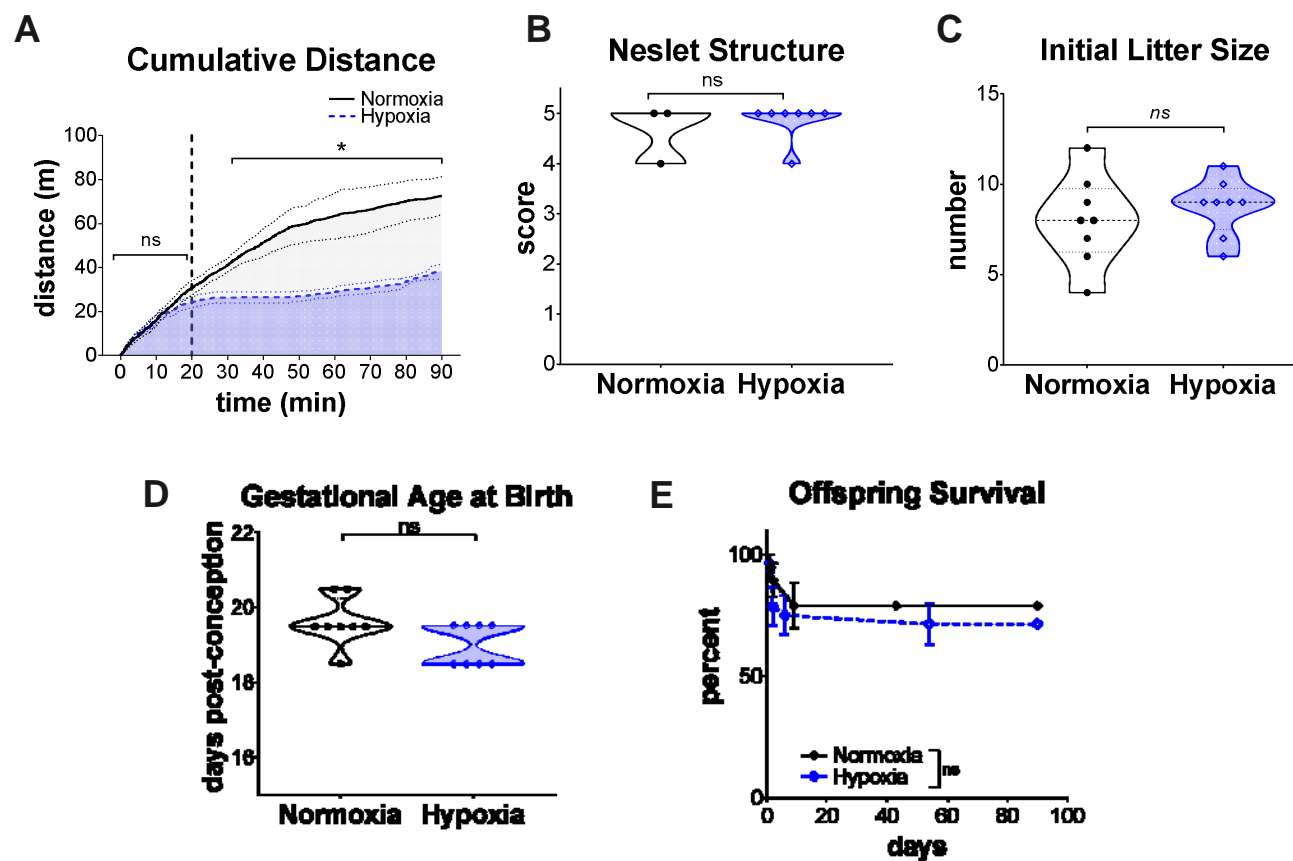

Figure 3

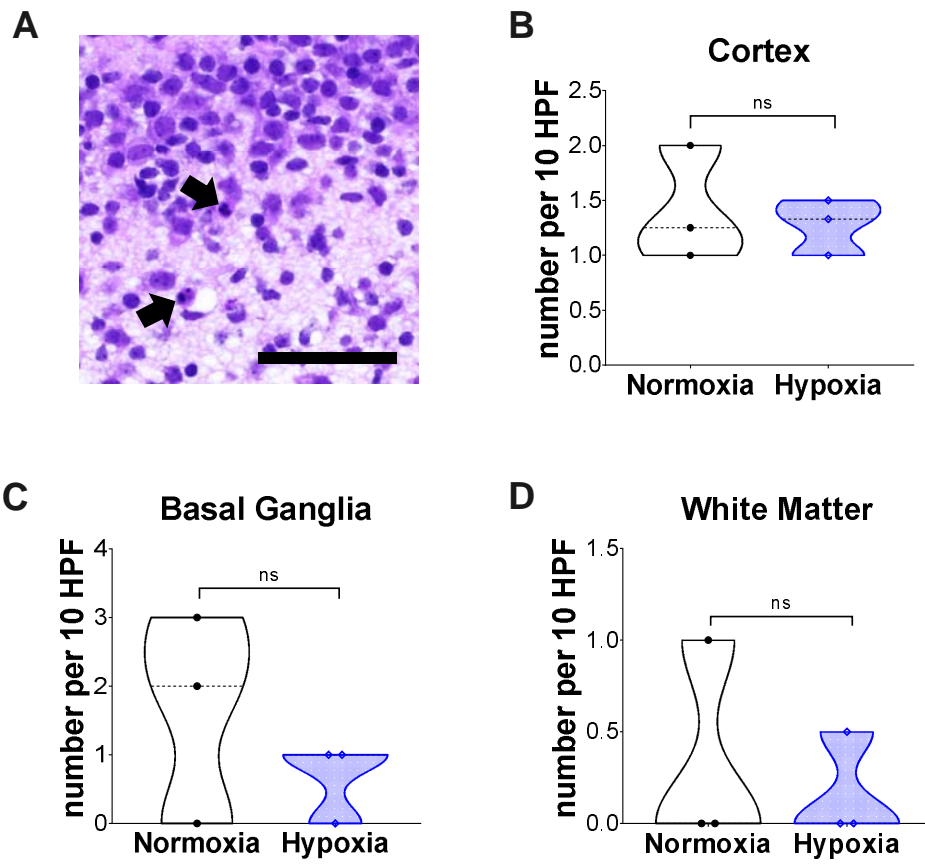

**Figure 4**

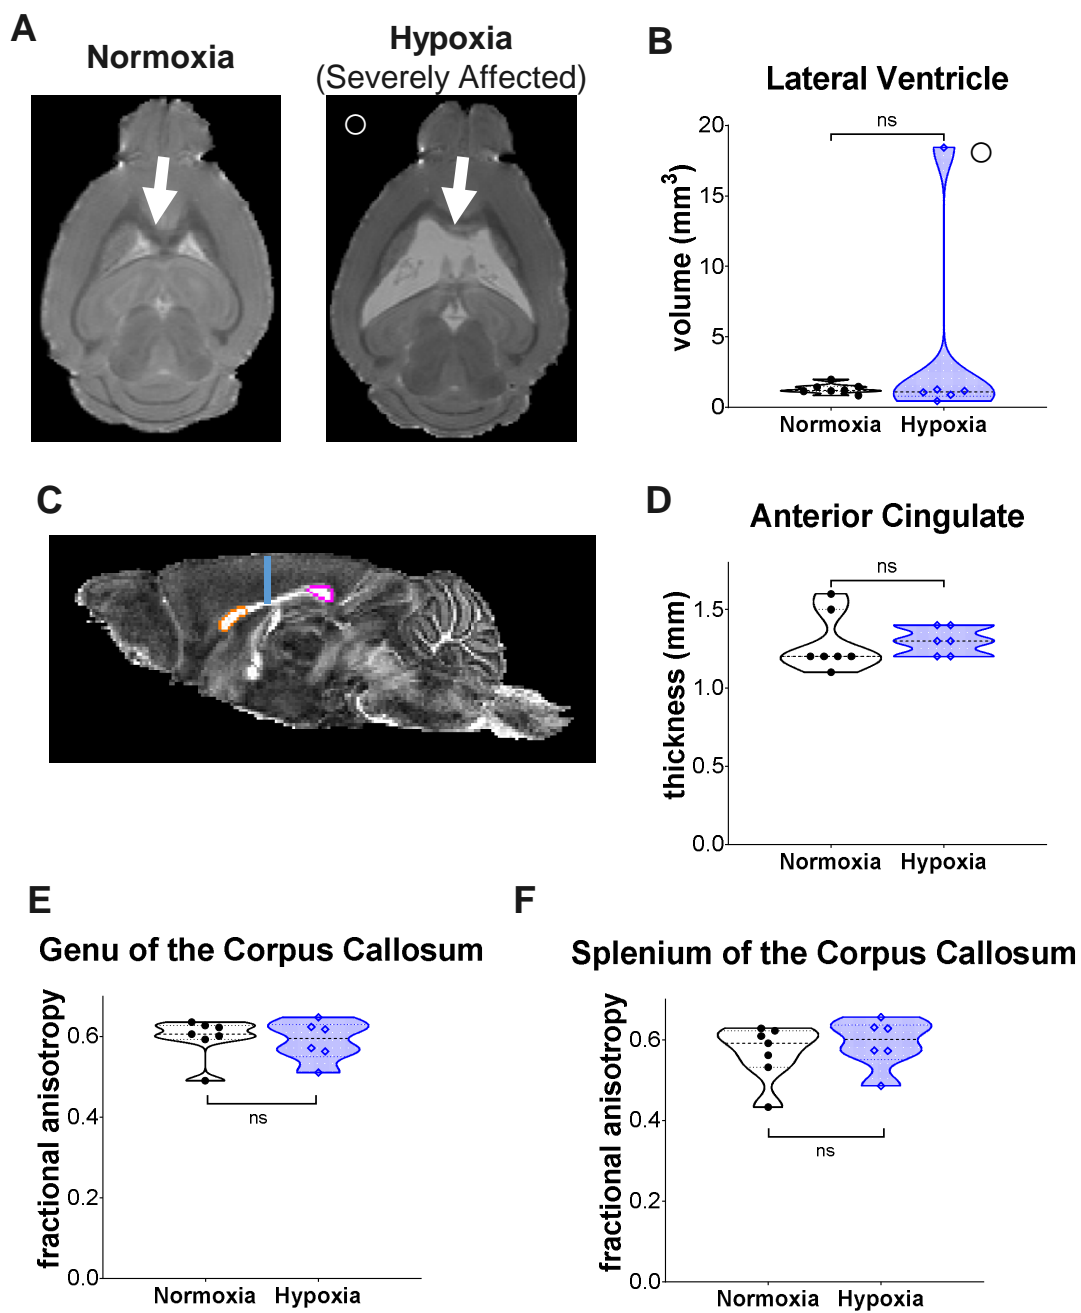

Figure 5

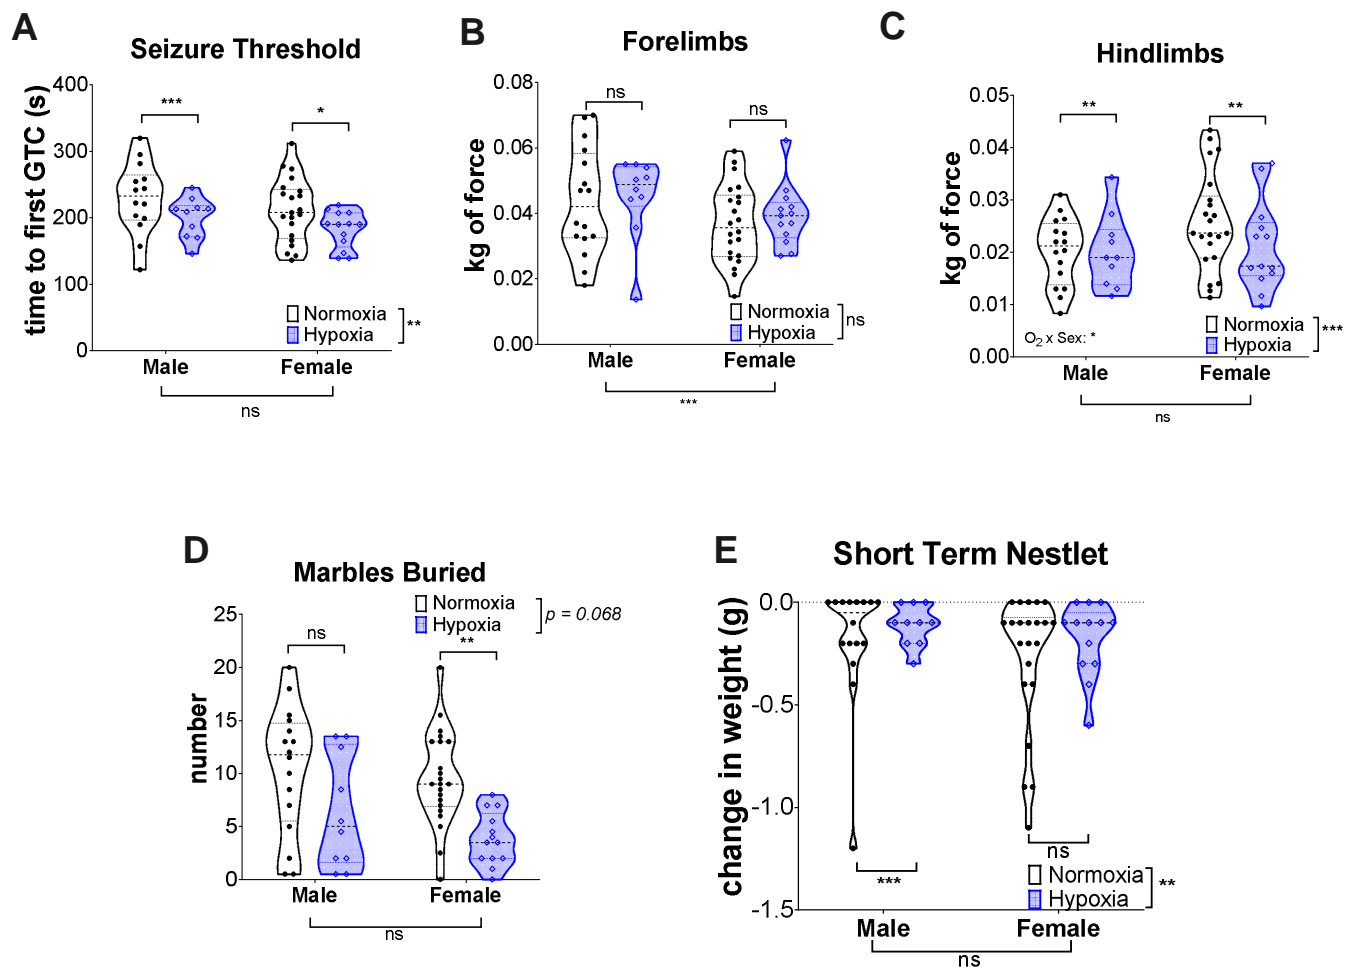

Figure 6

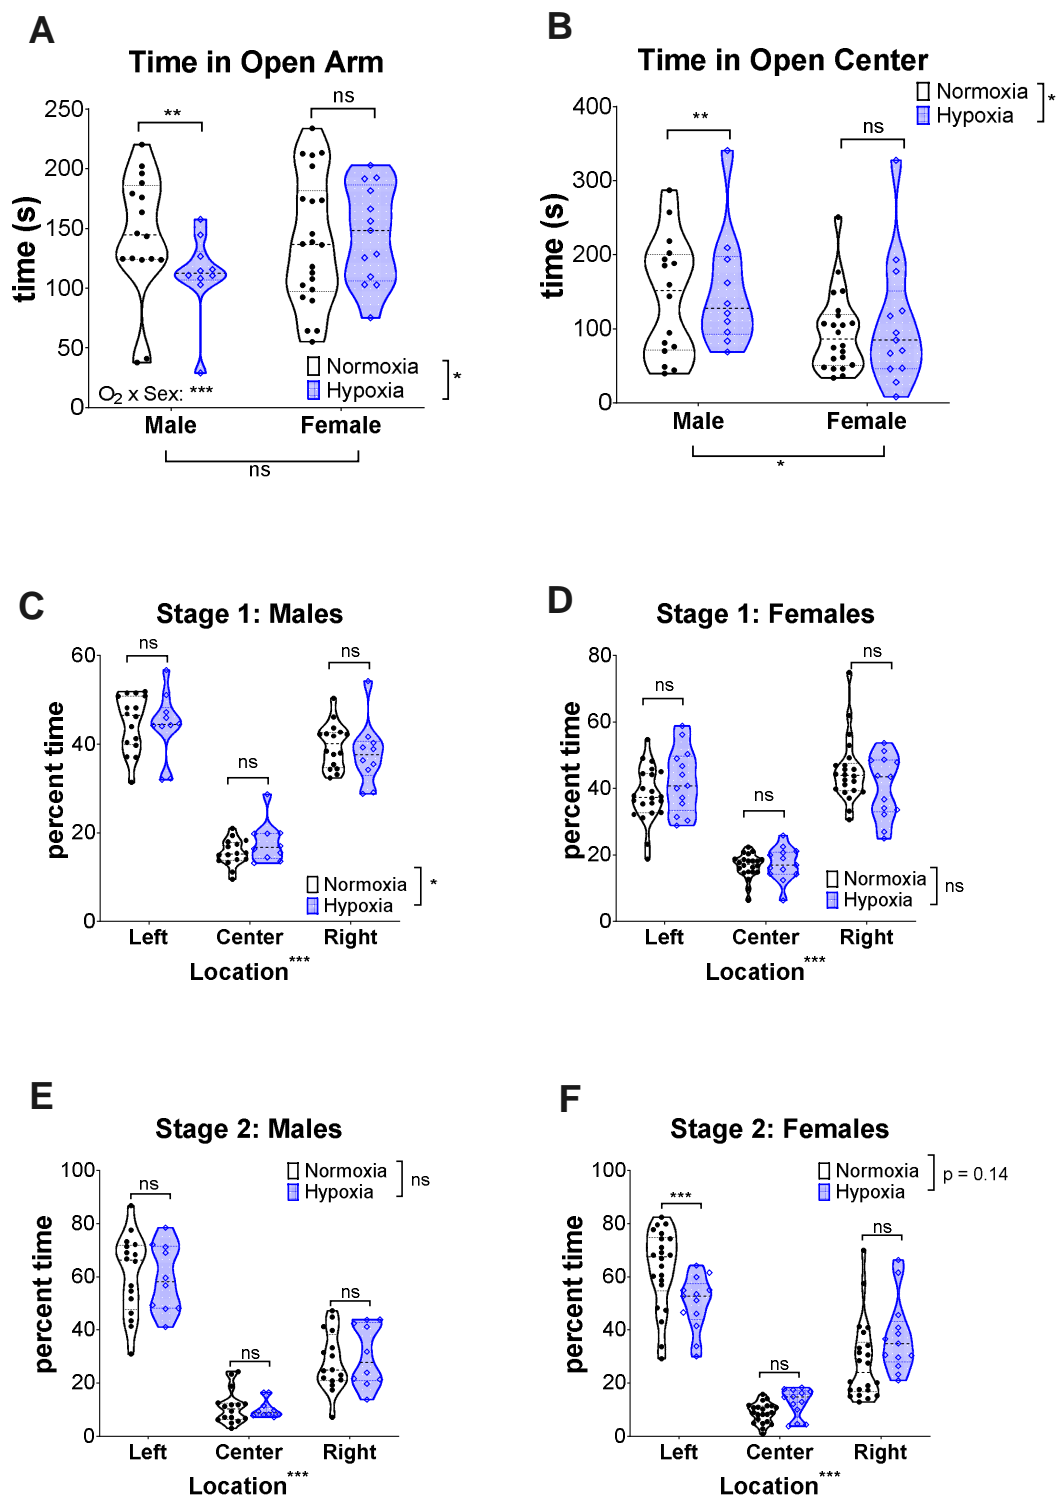

**Figure 7**

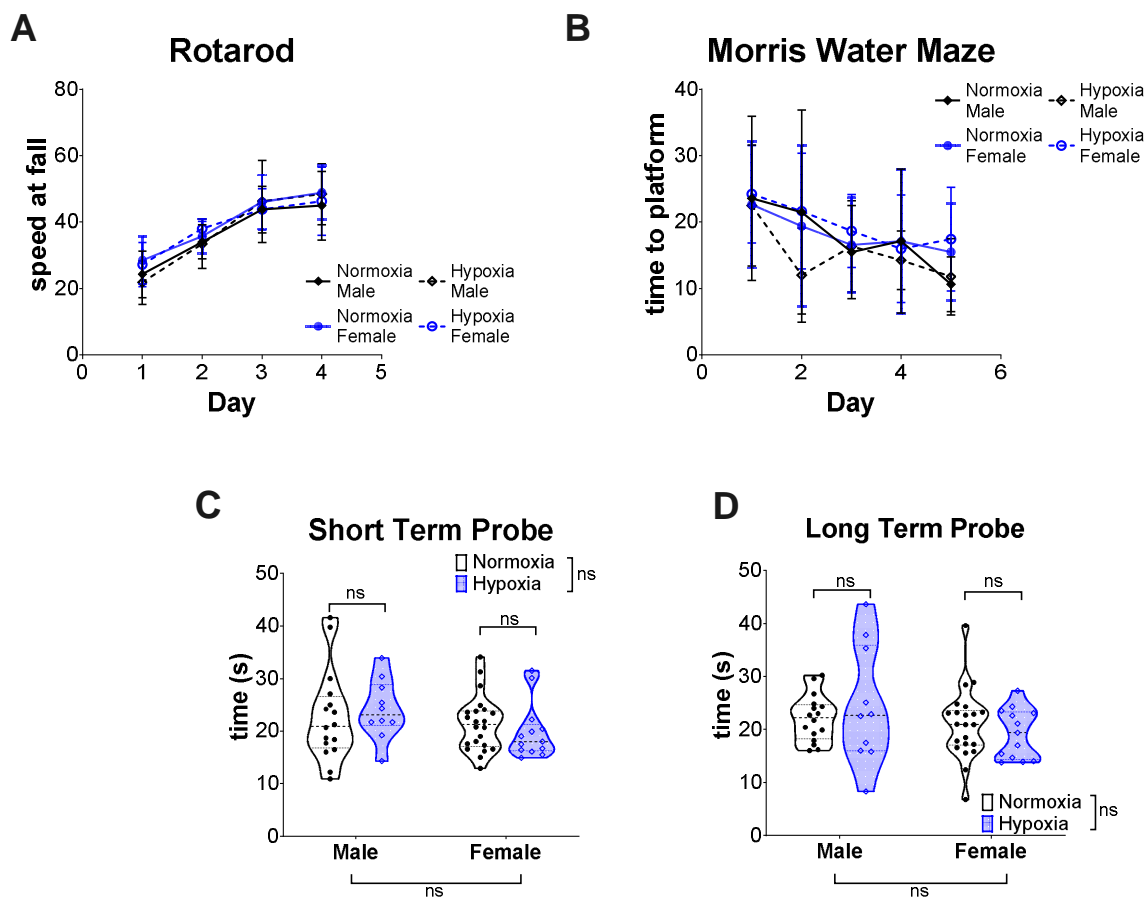

Source: https://www.biorxiv.org/content/biorxiv/early/2021/09/30/2021.08.04.451528.full.pdf
